# Supplementary material for: Atmospheric oil and natural gas hydrocarbon trends in the Northern Colorado Front Range are notably smaller than inventory emissions reductions
Source: Oxford University Press journal article supplement (doi:10.1525/elementa.2020.00136), 2021-01-01
Supplement: methane_and_nmhc_at_bao_supplemental_info_13april2021.docx [file methane_and_nmhc_at_bao_supplemental_info_13april2021.docx]

**Supplemental Material**

**Atmospheric oil and natural gas hydrocarbon trends in the Northern Colorado Front Range are notably smaller than inventory emissions reductions**

Samuel J. Oltmans1*, Lucy C. Cheadle2, Detlev Helmig3, Hélène Angot4, Gabrielle Pétron5,1, Stephen A. Montzka1, Edward J. Dlugokencky1, Benjamin Miller5,1, Bradley Hall1, Russell C. Schnell5,1, Jonathan Kofler5,1, Sonja Wolter5,1, Molly Crotwell5,1, Carolina Siso5,1, Pieter Tans1, Arlyn Andrews1

1 NOAA/ESRL Global Monitoring Laboratory, Boulder, Colorado USA

2 P.O. Box 2815, Sacramento, California USA

3 Boulder AIR, Boulder, Colorado, USA

4 INSTAAR, University of Colorado, Boulder, Colorado USA

5 CIRES, University of Colorado, Boulder, Colorado USA

*Corresponding author: 1 [samuel.j.oltmans@noaa.gov](mailto:samuel.j.oltmans@noaa.gov)

**List of Contents**

Figures

Figure S1: Monthly propane mole fractions at NWR for 2012-2017. The horizontal red line in each box is the median, the box spans the 25th and 75th percentiles, the vertical bars the 5th and 95th percentiles, the red pluses values >95th percentile, and the green dots are the mean. N = the number of flask sample observations.

Figure S2: PSCF for the ratio of i-pentane/n-pentane <1 for 2007-2016 (all seasons; n = 2520) in flasks collected during daytime hours at BAO (black dot).

Figure S3: Monthly mole fractions of methane at BAO and NWR for 2008-2015. The box whisker format is the same as in Fig. S1.

Figure S4: Correlation between BAO residual methane (ppm) and propane (ppb) for samples with wind directions from the NE quadrant for 2007-2012 (top left panel) and 2013-2016 (top right panel), and for all daytime samples for 2007-2012 (bottom left panel) and 2013-2016 (bottom right panel).

Figure S5: Photochemical season (May-Sept) mole fractions of methane at NWR (left panel) and BAO (right panel) for 2008-2015 for all daytime samples. The box whisker format is as in Fig. S1.

Figure S6: Ratio of the monthly median mole fractions of methane at BAO and NWR for 2008-2016 for all daytime samples. For each year, there are twelve monthly values (except 2016 where only January-June had samples), and the plotted symbols represent the variability of the twelve-monthly values, but do not include the variability of individual samples within the month. The box whisker format is the same as in Fig. S1.

Figure S7: i-pentane as a function of n-pentane at BAO for photochemical season daytime samples, color-coded for the concurrent propane mole fraction in the sample.

Figure S8: Ratio of the mole fractions of i-pentane to n-pentane at BAO for the years 2008-2015 for the full year (left panel) and photochemical season (right panel) for all daytime samples. The box whisker format is the same as in Fig. S1.

Figure S9: Mole fractions of acetylene at BAO for the years 2008-2015 for the full year (left panel) and photochemical season (right panel). Note the different y-axis scale on the two panels. The box whisker format is the same as in Fig. S1.

Figure S10: Ratio of acetylene/i-pentane (left panel) and acetylene/propane (right panel) mole fractions for samples with wind directions from the south sector. Note the different y-axis scale on the two panels. The box whisker format is as in Fig. S1.

Tables

Table S1: Number of flask samples collected each year at the BAO tower. The number of days on which samples were collected is also shown. During certain periods (primarily 2008-2012), samples were collected in pairs so that the number of days with samples is less than the total number of samples.

Table S2: Trend statistics for propane mole fractions at BAO for 2008-2015 for daytime samples with wind directions from the south sector.

Table S3: Trend statistics for methane mole fractions at NWR for 2008-2015 using all daytime samples.

Table S4a: Trend statistics for methane mole fractions at BAO for 2008-2015 using all daytime samples.

Table S4b: Trend statistics for methane mole fractions at BAO for 2008-2015 using daytime samples with wind directions from the NE quadrant.

Table S5: Trend statistics for the ratio of BAO to NWR methane mole fractions for 2008-2016 using all BAO daytime samples and NWR monthly medians.

Table S6: Trend statistics for the ratio of i-pentane to n-pentane at BAO for 2008-2015 for samples with wind directions from the south sector.

Table S7a: Trend statistics for acetylene mole fractions at BAO for 2008-2015 using daytime samples with wind directions from the NE quadrant.

Table S7b: Trend statistics for acetylene mole fractions at BAO for 2008-2015 for samples with wind directions from the south sector.


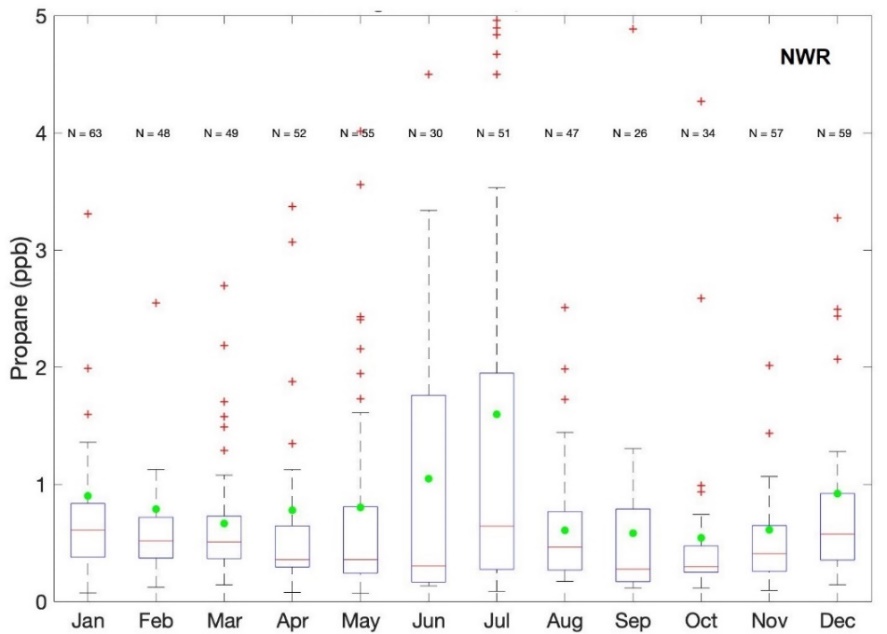


Figure S1: Monthly propane mole fractions at NWR for 2012-2017. The horizontal red line in each box is the median, the bottom and top of the box are the 25th and 75th percentiles, the vertical bars are the 5th and 95th percentiles, the red pluses values are >95th percentile, and the green dots are the mean. N = the total number of samples.


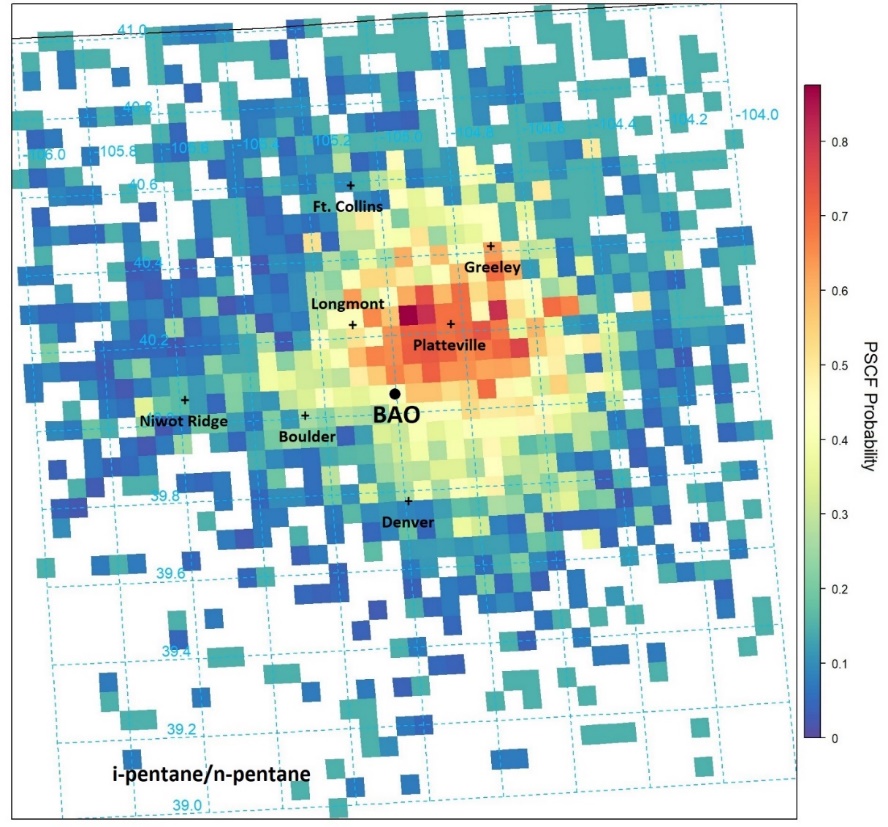


Figure S2: PSCF for the ratio of i-pentane/n-pentane <1 for 2007-2016 (all seasons; n = 2520) in flasks collected during daytime hours at BAO (black dot).


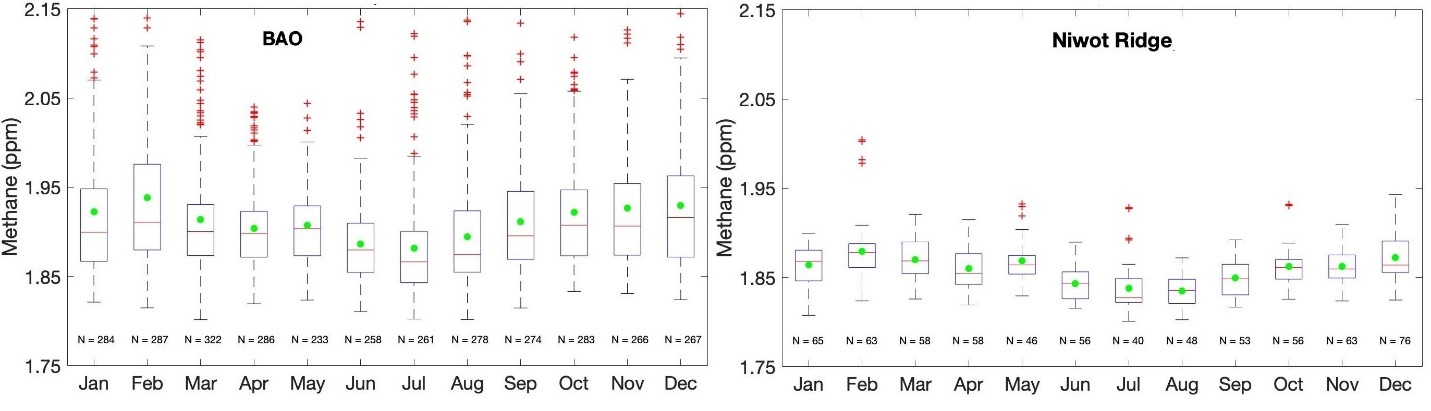


Figure S3: Monthly mole fractions of methane at BAO and NWR for 2008-2015. The box whisker format is the same as in Fig. S1.


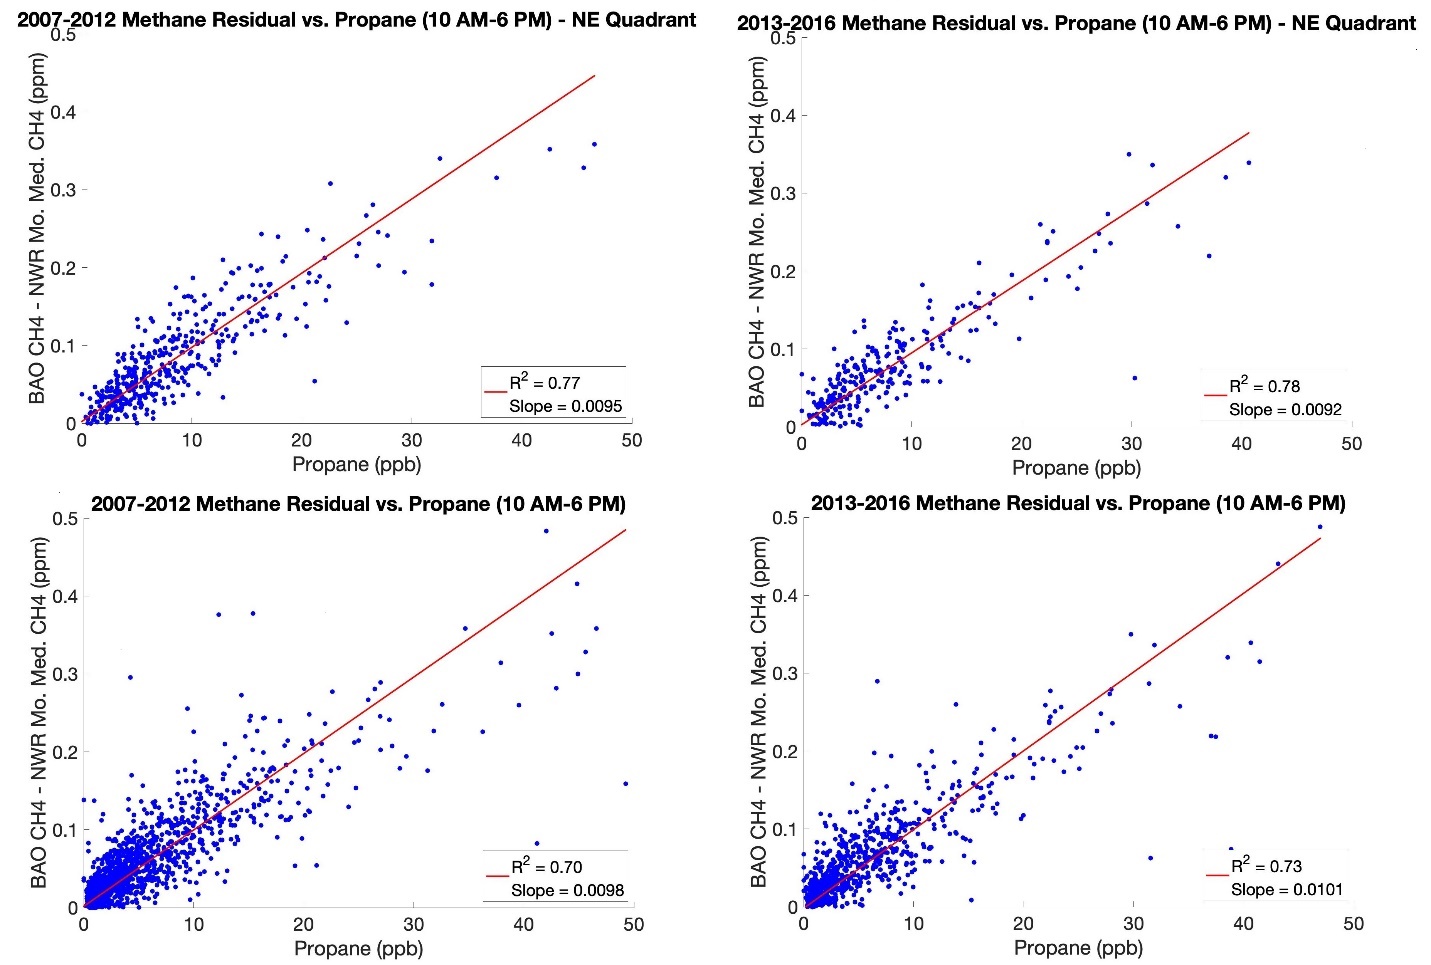


Figure S4: Correlation between BAO residual methane (ppm) and propane (ppb) for samples with wind directions from the NE quadrant for 2007-2012 (top left panel) and 2013-2016 (top right panel), and for all daytime samples for 2007-2012 (bottom left panel) and 2013-2016 (bottom right panel).


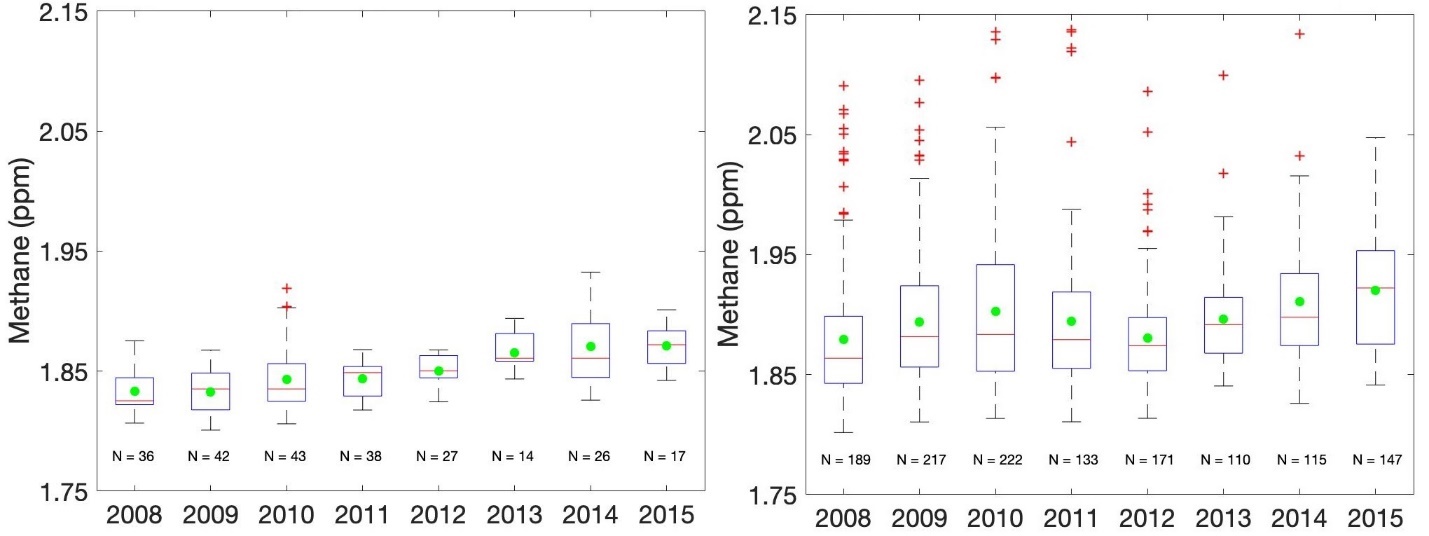


Figure S5: Photochemical season (May-Sept) mole fractions of methane at NWR (left panel) and BAO (right panel) for 2008-2015 for all daytime samples. The box whisker format is as in Fig. S1.


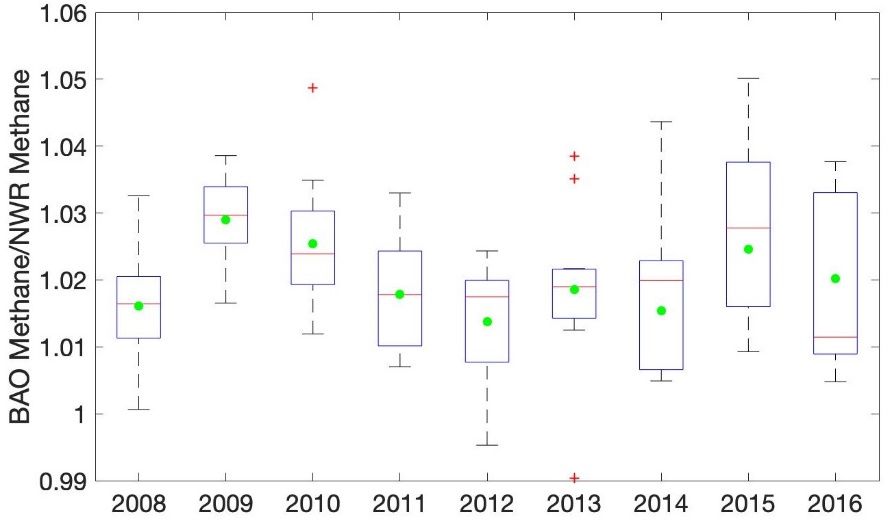


Figure S6: Ratio of the monthly median mole fractions of methane at BAO over NWR for 2008-2016 for all daytime samples. For each year there are twelve monthly values (except 2016 when only January-June had samples) and the plotted symbols represent the variability of the twelve monthly values but do not include the variability of individual samples within the month. The box whisker format is as in Fig. S1.


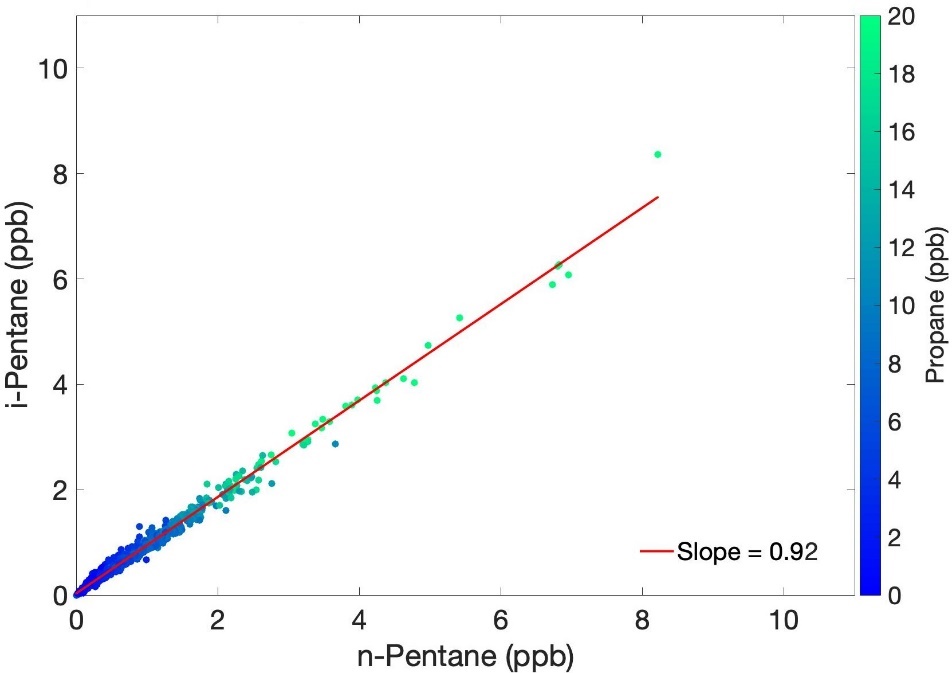


Figure S7: i-pentane as a function of n-pentane at BAO for photochemical season daytime samples color coded for the concurrent propane mole fraction in the sample for samples with wind directions from the NE quadrant


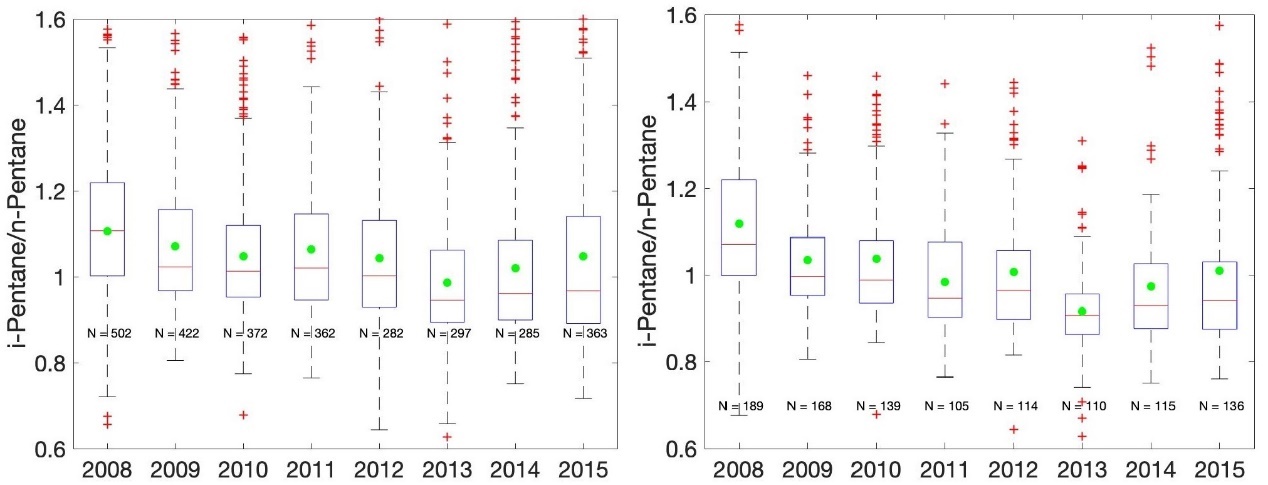


Figure S8: Ratio of the mole fractions of i-pentane to n-pentane at BAO for the years 2008-2015 for the full year (left panel) and photochemical season (right panel) and for all daytime samples. The box whisker format is as in Fig. S1.


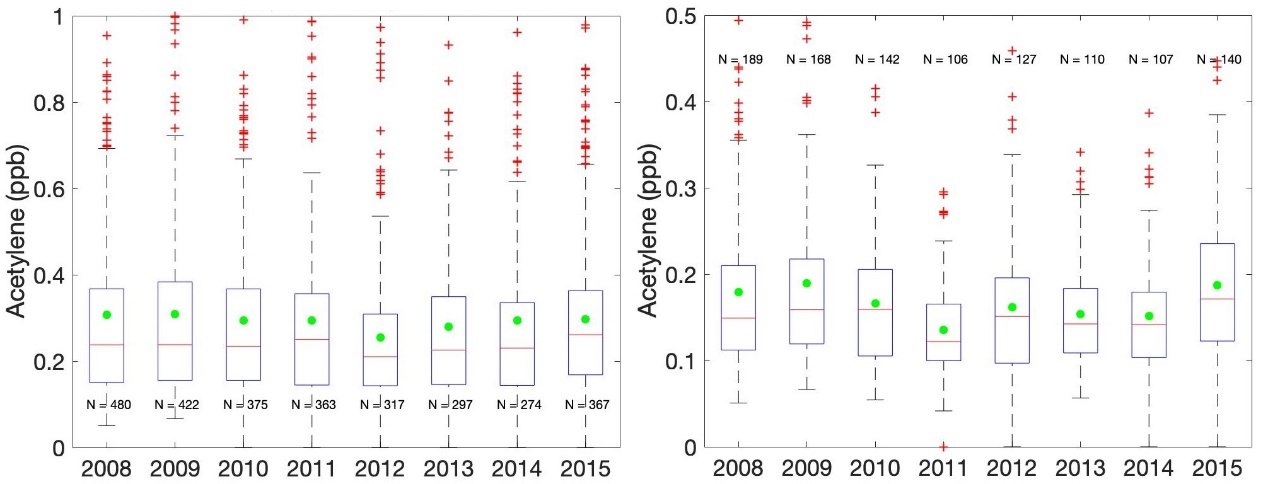


Figure S9: Mole fractions of acetylene at BAO for the years 2008-2015 for the full year (left panel) and photochemical season (right panel) for all daytime samples. Note the different y-axis scale on the two panels. The box whisker format is as in Fig. S1.


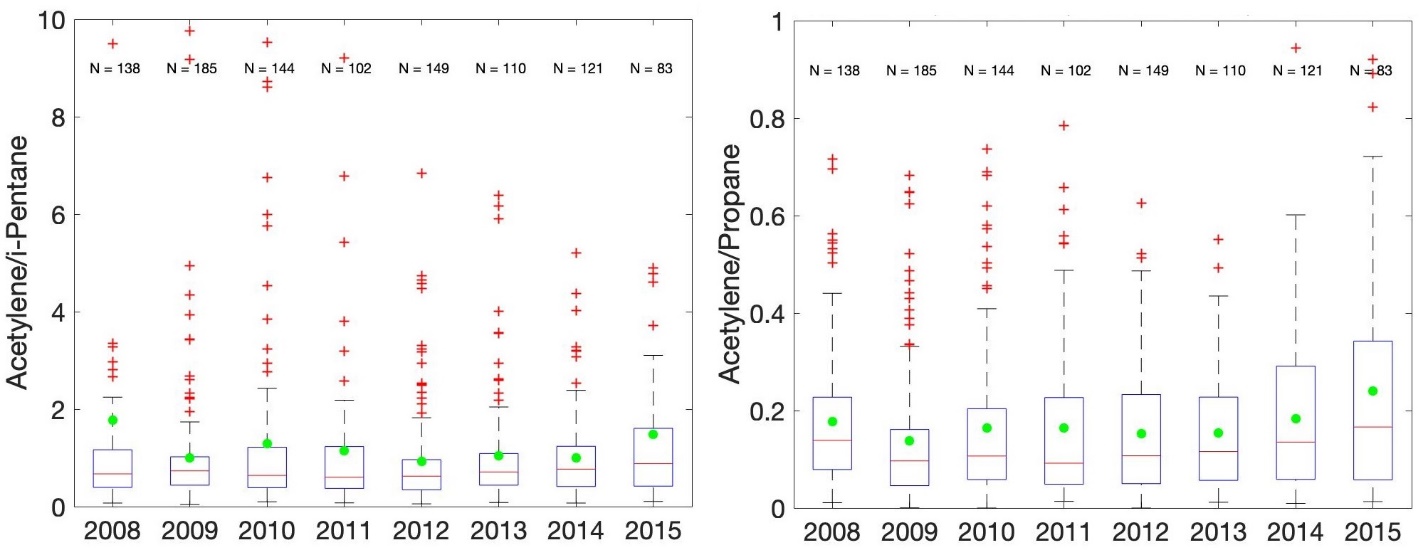


Figure S10: Ratio of acetylene/i-pentane (left panel) and acetylene/propane (right panel) mole fractions for samples with wind directions from the south sector. Note the different y-axis scale on the two panels. The box whisker format is as in Fig. S1.

Table S1: Number of flask samples collected each year at the BAO tower. The number of days on which samples were collected is also shown. During certain periods (primarily 2008-2012) samples were collected in pairs so that the number of days with samples is less than the total number of samples.

| Year | Daytime  Samples | Days with  Samples |
| --- | --- | --- |
| 2007 (Aug-Dec) | 144 | 94 |
| 2008 | 529 | 325 |
| 2009 | 504 | 263 |
| 2010 | 503 | 322 |
| 2011 | 399 | 202 |
| 2012 | 407 | 263 |
| 2013 | 298 | 298 |
| 2014 | 285 | 285 |
| 2015 | 374 | 254 |
| 2016 (Jan-Jul) | 144 | 137 |

Table S2: Trend statistics for propane mole fractions at BAO for 2008-2015 for daytime samples with wind directions from the south sector.

| Propane | Full Year | | | | Photochemical Season (May-Sept) | | | |
| --- | --- | --- | --- | --- | --- | --- | --- | --- |
|  | Value (ppb) | Slope  (ppb yr-1) | 2 Sigma Standard Deviation (ppb yr-1) | P-Value | Value (ppb) | Slope  (ppb yr-1) | 2 Sigma Standard Deviation (ppb yr-1) | P-Value |
| Mean | 8.151 | -1.663 | 8.317 | 0.301 | 2.809 | -0.118 | 0.281 | 0.055 |
| Median | 2.318 | -0.118 | 0.283 | 0.056 | 1.755 | -0.029 | 0.357 | 0.662 |
| 5th %ile | 0.428 | -0.024 | 0.073 | 0.117 | 0.397 | -0.023 | 0.165 | 0.457 |
| 25th %ile | 1.072 | -0.060 | 0.170 | 0.094 | 0.940 | -0.045 | 0.216 | 0.288 |
| 75th %ile | 4.664 | -0.109 | 0.674 | 0.395 | 3.644 | -0.057 | 0.866 | 0.721 |
| 95th %ile | 14.922 | -10.685 | 56.498 | 0.326 | 8.854 | -0.518 | 0.872 | 0.015 |

Table S3: Trend statistics for methane mole fractions at NWR for 2008-2015 using all daytime samples.

| Methane | | Full Year | | | | Photochemical Season (May-Sept) | | | |
| --- | --- | --- | --- | --- | --- | --- | --- | --- | --- |
|  | | Value (ppm) | Slope  (ppm yr-1) | 2 Sigma Standard Deviation (ppm yr-1) | P-Value | Value (ppm) | Slope  (ppm yr-1) | 2 Sigma Standard Deviation  (ppm yr-1) | P-Value |
| Mean | 1.860 | | 0.007 | 0.003 | 0.000 | 1.847 | 0.006 | 0.004 | 0.000 |
| Median | 1.859 | | 0.007 | 0.002 | 0.000 | 1.845 | 0.006 | 0.003 | 0.000 |
| 5th %ile | 1.820 | | 0.005 | 0.006 | 0.003 | 1.813 | 0.005 | 0.007 | 0.004 |
| 25th %ile | 1.841 | | 0.007 | 0.003 | 0.000 | 1.828 | 0.006 | 0.006 | 0.002 |
| 75th %ile | 1.875 | | 0.007 | 0.005 | 0.000 | 1.861 | 0.007 | 0.005 | 0.000 |
| 95th %ile | 1.908 | | 0.006 | 0.011 | 0.020 | 1.896 | 0.006 | 0.019 | 0.132 |

Table S4a: Trend statistics for methane mole fractions at BAO for 2008-2015 using all daytime samples.

| Methane | Full Year | | | | Photochemical Season (May-Sept) | | | |
| --- | --- | --- | --- | --- | --- | --- | --- | --- |
|  | Value (ppm) | Slope  (ppm yr-1) | 2 Sigma Standard Deviation (ppm yr-1) | P-Value | Value (ppm) | Slope  (ppm yr-1) | 2 Sigma Standard Deviation (ppm yr-1) | P-Value |
| Mean | 1.912 | 0.005 | 0.010 | 0.029 | 1.896 | 0.004 | 0.009 | 0.050 |
| Median | 1.896 | 0.005 | 0.008 | 0.014 | 1.883 | 0.006 | 0.009 | 0.009 |
| 5th %ile | 1.836 | 0.006 | 0.004 | 0.000 | 1.828 | 0.006 | 0.005 | 0.001 |
| 25th %ile | 1.867 | 0.006 | 0.005 | 0.001 | 1.857 | 0.004 | 0.004 | 0.002 |
| 75th %ile | 1.938 | 0.005 | 0.012 | 0.056 | 1.924 | 0.004 | 0.016 | 0.219 |
| 95th %ile | 2.036 | 0.005 | 0.027 | 0.314 | 1.996 | -0.007 | 0.019 | 0.078 |

Table S4b: Trend statistics for methane mole fractions at BAO for 2008-2015 using daytime samples with wind directions from the northeast quadrant.

| Methane | Full Year | | | | Photochemical Season (May-Sept) | | | |
| --- | --- | --- | --- | --- | --- | --- | --- | --- |
|  | Value (ppm) | Slope  (ppm yr-1) | 2 Sigma Standard Deviation (ppm yr-1) | P-Value | Value (ppm) | Slope  (ppm yr-1) | 2 Sigma Standard Deviation (ppm yr-1) | P-Value |
| Mean | 1.940 | 0.005 | 0.015 | 0.095 | 1.917 | 0.004 | 0.011 | 0.089 |
| Median | 1.924 | 0.004 | 0.011 | 0.088 | 1.904 | 0.005 | 0.014 | 0.098 |
| 5th %ile | 1.854 | 0.006 | 0.005 | 0.001 | 1.845 | 0.006 | 0.004 | 0.000 |
| 25th %ile | 1.888 | 0.006 | 0.008 | 0.005 | 1.876 | 0.007 | 0.008 | 0.003 |
| 75th %ile | 1.968 | 0.002 | 0.019 | 0.499 | 1.941 | 0.002 | 0.015 | 0.431 |
| 95th %ile | 2.077 | 0.011 | 0.043 | 0.198 | 2.029 | -0.002 | 0.030 | 0.775 |

Table S5: Trend statistics for the ratio of BAO to NWR methane mole fractions for 2008-2016 using all BAO daytime samples and NWR monthly medians.

| Methane | Full Year | | | Photochemical Season (May-Sept) | | |
| --- | --- | --- | --- | --- | --- | --- |
|  | Slope  (yr-1) | 2 Sigma Standard Deviation (yr-1) | P-Value | Slope  (yr-1) | 2 Sigma  Standard Deviation (yr-1) | P-Value |
| Mean | -0.001 | 0.005 | 0.300 | -0.001 | 0.005 | 0.340 |
| Median | -0.001 | 0.004 | 0.237 | 0.000 | 0.005 | 0.999 |
| 5th %ile | -0.001 | 0.003 | 0.209 | 0.000 | 0.007 | 0.699 |
| 25th %ile | 0.000 | 0.003 | 0.668 | 0.000 | 0.004 | 0.844 |
| 75th %ile | -0.001 | 0.006 | 0.318 | -0.001 | 0.008 | 0.522 |
| 95th %ile | -0.002 | 0.015 | 0.489 | -0.005 | 0.011 | 0.019 |

Table S6: Trend statistics for the ratio of i-pentane to n-pentane at BAO for 2008-2015 for samples with wind directions from the south sector.

| i-pentane/  n-pentane | Full Year | | | Photochemical Season (May-Sept) | | |
| --- | --- | --- | --- | --- | --- | --- |
|  | Slope  (yr-1) | 2 Sigma Standard Deviation (yr--1) | P-Value | Slope  (yr-1) | 2 Sigma  Standard Deviation (yr-1) | P-Value |
| Mean | -0.002 | 0.029 | 0.651 | -0.010 | 0.059 | 0.399 |
| Median | -0.012 | 0.032 | 0.079 | -0.022 | 0.045 | 0.035 |
| 5th %ile | -0.009 | 0.028 | 0.100 | -0.012 | 0.045 | 0.166 |
| 25th %ile | -0.012 | 0.017 | 0.006 | -0.015 | 0.025 | 0.014 |
| 75th %ile | -0.002 | 0.056 | 0.882 | -0.003 | 0.105 | 0.877 |
| 95th %ile | 0.015 | 0.069 | 0.275 | 0.016 | 0.100 | 0.394 |

Table S7a: Trend statistics for acetylene mole fractions at BAO for 2008-2015 using daytime samples with wind directions from the NE quadrant.

| Acetylene | Full Year | | | | Photochemical Season (May-Sept) | | | |
| --- | --- | --- | --- | --- | --- | --- | --- | --- |
|  | Value (ppb) | Slope  (ppb yr-1) | 2 Sigma Standard Deviation (ppb yr-1) | P-Value | Value (ppb) | Slope  (ppb yr-1) | 2 Sigma Standard Deviation (ppb yr-1) | P-Value |
| Mean | 0.276 | 0.000 | 0.023 | 0.974 | 0.180 | -0.003 | 0.019 | 0.486 |
| Median | 0.232 | 0.005 | 0.022 | 0.208 | 0.158 | -0.000 | 0.020 | 0.915 |
| 5th %ile | 0.089 | -0.001 | 0.009 | 0.529 | 0.081 | -0.001 | 0.009 | 0.534 |
| 25th %ile | 0.152 | 0.001 | 0.018 | 0.795 | 0.117 | 0.002 | 0.013 | 0.538 |
| 75th %ile | 0.352 | -0.003 | 0.022 | 0.447 | 0.206 | -0.003 | 0.018 | 0.349 |
| 95th %ile | 0.590 | -0.011 | 0.059 | 0.322 | 0.383 | -0.012 | 0.067 | 0.335 |

Table 7b: Trend statistics for acetylene mole fractions at BAO for 2008-2015 using daytime samples with wind directions from the south.

| Acetylene | Full Year | | | | Photochemical Season (May-Sept) | | | |
| --- | --- | --- | --- | --- | --- | --- | --- | --- |
|  | Value (ppb) | Slope  (ppb yr-1) | 2 Sigma Standard Deviation (ppb yr-1) | P-Value | Value (ppb) | Slope  (ppb yr-1) | 2 Sigma Standard Deviation (ppb yr-1) | P-Value |
| Mean | 0.331 | -0.001 | 0.025 | 0.768 | 0.169 | -0.003 | 0.019 | 0.432 |
| Median | 0.250 | 0.001 | 0.025 | 0.873 | 0.150 | 0.000 | 0.015 | 0.972 |
| 5th %ile | 0.091 | -0.001 | 0.008 | 0.454 | 0.082 | -0.001 | 0.010 | 0.594 |
| 25th %ile | 0.153 | 0.002 | 0.012 | 0.423 | 0.111 | -0.001 | 0.006 | 0.325 |
| 75th %ile | 0.406 | -0.004 | 0.033 | 0.510 | 0.200 | -0.003 | 0.020 | 0.438 |
| 95th %ile | 0.878 | -0.010 | 0.120 | 0.660 | 0.312 | -0.009 | 0.069 | 0.466 |
